# Supplementary material
Source: publisher figshare collection journal article supplement (https://geolsoc.figshare.com/ndownloader/files/21886503)
Supplement: Supplementary file 1 [file 21886503]

## Sheet: bulk-rock maj.+trace elements
			ICP-OES data																										ICP-MS data
Locality	Unknown samples	Batch	SiO2	TiO2	Al2O3	Fe2O3	MnO	MgO	CaO	Na2O	K2O	P2O5	Cr2O3	LOI	Total		Sc	V	Cr	Co	Ni	Cu	Zn	Sr	Y	Zr	Ba		49TiO2	51V	52Cr	55MnO	57Fe2O3	59Co	60Ni	65Cu	66Zn	71Ga	85Rb	88Sr	89Y	90Zr	93Nb	133Cs	137Ba	139La	140Ce	141Pr	146Nd
			wt. %	wt. %	wt. %	wt. %	wt. %	wt. %	wt. %	wt. %	wt. %	wt. %	wt. %	wt. %	wt. %		ppm	ppm	ppm	ppm	ppm	ppm	ppm	ppm	ppm	ppm	ppm		ppm	ppm	ppm	wt. %	wt. %	ppm	ppm	ppm	ppm	ppm	ppm	ppm	ppm	ppm	ppm	ppm	ppm	ppm	ppm	ppm	ppm
Achiltibuie	LW16-799A	4	45.2597	0.258023	5.01357	11.2218	0.164367	26.5191	7.58632	0.302944	0.0370779	0.0194803	0.376514	2.52707	99.286		23.9117	115.778	2578.86	53.1301	1127.46	83.7291	101.466	47.1609	6.31775	17.8667	13.4902		0.267781	116.389	2674.07	0.158923	12.4723	98.0804	1128.7	72.4596	99.8713	6.16321	1.06894	47.1318	6.27357	14.6582	0.767266	0.0766541	12.5379	0.747415	2.08523	0.317019	1.60284
Achiltibuie	LW16-799B	4	43.0637	0.25701	5.54103	10.7867	0.178395	26.7718	7.51972	0.595262	0.0973052	0.029678	0.370531	4.76839	99.9795		24.2146	106.331	2537.88	51.7382	1140.43	38.8347	51.2484	90.0327	6.60801	60.4543	23.9114		0.25837	106.062	2577.75	0.177304	11.4909	94.5264	1096.39	37.4564	49.6871	6.00653	5.14847	85.9522	6.76394	67.9315	2.5874	0.310557	24.9184	2.2758	5.53658	0.635789	2.66316
Achiltibuie	LW16-808A	4	43.624	0.221395	4.25265	11.8689	0.171628	29.703	5.99309	0.154029	0.00494899	0.0122934	0.356479	4.90378	101.266		20.6619	96.7391	2441.64	56.9448	1942.92	8.76889	68.2806	38.4936	4.62347	10.0462	10.4779		0.228976	96.3568	2380.52	0.172921	9.66832	115.474	1915.85	4.9259	63.7511	5.39999	0.543389	38.7276	4.69698	11.5855	0.560734	0.148595	11.4272	0.471341	1.39541	0.215987	1.23716
Achmelvich	LW16-619B	4	48.0847	0.388925	7.82858	12.3449	0.198377	17.4717	9.67004	0.900297	1.206	0.0324329	0.380109	2.58109	101.087		28.7158	154.39	2603.49	58.4598	481.193	30.5524	94.6914	13.1245	11.5779	31.5326	431.454		0.383423	149.631	2603.2	0.195778	12.7054	60.3341	458.254	31.4327	91.1736	9.5171	12.963	13.3264	11.8701	30.6038	1.35921	0.457588	428.887	1.01019	3.97472	0.679151	3.80666
Achmelvich	LW16-620A	4	48.9028	0.342029	6.42159	15.0186	0.232205	16.8534	8.61668	0.930266	0.081437	0.00287729	0.445218	0.701375	98.5485		18.7734	114.384	3049.44	73.5778	5900.75	2274.01	144.556	7.35103	11.1131	29.8153	29.2615		0.346903	120.815	3060.12	0.228996	13.9085	8586.69	6117.7	2343.48	140.98	10.8246	0.703459	7.95006	11.9738	32.4019	4.41825	0.0624417	29.2812	0.69746	3.08986	0.518979	2.84429
Achmelvich	LW17-AM2	5	44.5045	0.292709	6.09817	10.5989	0.179514	27.3507	6.41026	0.120749	0.0209071	0.0194332	0.408999	4.74708	100.752		26.237	131.126	2801.37	49.6149	1060.79	68.4251	108.863	15.2957	5.85661	11.1973	2.35428		0.286371	135.631	2666.31	0.181763	10.2822	47.2029	1042.43	71.8001	100.502	6.95926	0.109357	15.4319	5.90065	12.4193	0.508958	0.0182063	2.15487	0.283551	1.13164	0.24543	1.29696
Achmelvich	LW17-AM6	5	43.0207	0.306139	6.33657	11.5185	0.179258	26.4837	6.92667	0.172422	0.0407904	0.0272004	0.34558	3.94913	99.3067		25.6614	137.562	2366.98	54.608	1078.89	91.263	202.933	10.19	9.71297	12.6944	6.11061		0.288777	136.566	2393.53	0.17183	11.3806	52.9409	1100.64	77.7029	192.392	6.89129	0.275033	9.8229	9.57422	14.3901	0.45923	0.0108196	4.3332	0.552443	2.78666	0.585584	3.18212
Ben Auskaird	LEW001	1	58.603	0.616357	13.0744	10.8605	0.185421	3.62205	7.08698	2.97948	0.521626	0.051425	0.0117651	1.3548	98.9678		36.69	214.584	80.5826	35.512	204.17	42.6315	53.9194	119.119	20.5757	44.6244	123.424		0.620661	220.929	78.7409	0.177575	9.92584	36.0216	214.267	40.023	45.2072	17.6288	4.41471	114.504	20.2123	40.0013	7.32808	0.0722955	114.999	9.99857	20.8033	2.77104	10.2902
Ben Auskaird	LEW004	1	47.3747	3.18535	12.8752	20.1264	0.244278	3.44177	7.88075	2.71215	0.657936	0.387518	0.0212485	0.7569	99.6642		43.3631	399.266	145.538	45.4383	193.35	49.917	79.9621	113.983	45.5694	92.4071	174.514		3.09954	380.076	140.998	0.259005	17.6372	41.6108	183.288	51.7941	80.4749	20.9881	5.91594	98.2709	44.5245	88.3172	13.8247	0.0837697	160.385	13.1248	32.6358	5.00825	22.0628
Ben Dreavie	LW17-BD1	5	47.7031	0.240663	5.15843	13.6905	0.229	27.137	2.85	0.395826	0.199822	0.0171562	0.405608	0.848328	98.8754		22.2689	130.219	2778.14	65.3025	1169.44	124.162	187.886	100.331	4.56728	14.0265	236.635		0.248874	140.05	2742.78	0.237578	13.9414	66.2104	1134.41	114.299	195.815	7.95956	4.85209	100.936	4.97331	13.8549	1.09519	0.196236	231.047	11.0353	24.5205	2.62516	7.94514
Ben Dreavie	LW17-BD2	5	46.0896	0.283661	4.94823	11.3475	0.206068	28.2979	6.30988	0.283742	0.0821103	0.0155143	0.370841	1.99029	100.225		23.1446	122.683	2540	54.1051	1119.66	97.4514	157.64	138.93	5.13974	10.8675	115.841		0.280775	135.655	2492.8	0.210401	11.4958	59.2649	1189.78	96.4015	151.656	6.24724	1.62966	138.086	5.40528	10.9593	0.387607	0.104299	109.976	16.2588	40.3135	4.31048	11.8874
Ben Strome	LEW010	1	40.2882	2.24722	13.7137	20.0664	0.268151	6.05472	11.242	0.85889	0.232785	0.0130592	0.0155643	4.109	99.1096		67.618	509.078	106.605	74.4796	237.498	187.66	63.395	116.599	26.1406	15.0021	27.671		2.22812	525.546	106.226	0.260262	18.8249	71.0584	246.926	197.559	64.8462	17.3206	4.74251	110.532	25.4394	12.5589	3.81646	0.0725521	27.671	1.06055	6.98526	1.80675	9.56353
Ben Strome	LEW011	1	33.7434	15.954	7.84284	27.4398	0.206144	4.93713	9.0965	1.12163	0.0900749	0.0145648	0.0481605	-0.921	99.5732		44.8168	612.481	329.866	57.0211	846.961	74.9452	130.743	49.3697	14.0642	103.329	17.8538		16.3768	611.535	331.17	0.213756	23.584	56.1938	865.014	70.1919	120.28	13.505	1.78199	44.2235	13.4263	101.062	102.976	0.0582347	15.1599	6.25858	21.3216	3.58835	14.2186
Ben Strome	LEW012	1	46.6352	0.939425	8.63685	19.6124	0.193962	6.62198	12.0302	1.29523	0.05861	0.0297323	0.0224973	3.2198	99.2959		44.8759	402.728	154.091	122.489	283.478	1007.21	68.5714	38.3533	22.5524	35.9797	83.8583		0.947712	380.537	162.883	0.191303	17.7415	123.896	291.424	1014.67	63.7631	16.6254	1.24418	36.1904	21.0045	34.2061	4.94327	0.0893533	83.2917	2.68353	10.4964	2.12203	10.8147
Ben Strome	Lw16_510b	3	45.6682	1.00549	16.0017	12.368	0.194043	9.61259	12.9118	2.08741	0.128499	0.0348852		0.630832	100.643		44.0118	304.025	484.488	51.4072	246.833	155.739	80.5688	137.401	19.5773	28.6193	40.7423		1.00184	287.802	481.352	0.193529	11.3299	53.5598	236.579	145.623	84.096	17.4516	1.10346	140.16	20.3194	34.5643	1.47241	0.222081	42.8489	1.18135	4.08774	0.803854	4.45064
Ben Strome	Lw16_Z1	3	46.1118	1.13295	14.35	13.7469	0.12456	10.8689	9.90358	2.51538	0.332033	0.0964437		0.975423	100.158		31.3964	245.809	200.329	45.0923	321.408	149.018	120.42	303.102	13.5892	22.3829	71.7826		1.1248	235.194	190.779	0.123137	10.172	44.2609	329.246	147.948	119.167	14.7247	4.44751	308.128	10.8146	24.9628	3.37491	0.047556	56.821	4.52342	13.4813	2.33762	10.3276
Ben Strome	Lw16_Z13a	2	44.1849	0.717438	15.0623	12.823	0.219139	12.9226	11.6237	1.90455	0.506619	0.0658547		0.421517	100.452		38.9266	283.85	322.712	45.3115	185.001	20.1856	-76.1464	161.319	22.2175	30.8763	90.1206		0.718915	300.791	351.355	0.218464	11.5418	45.3696	173.619	21.546	41.7776	14.8783	9.59104	167.05	21.2396	29.2978	2.53152	0.155586	89.5301	2.70188	8.18366	1.36167	6.41506
Ben Strome	Lw16_Z13c	2	40.4012	0.325993	10.6386	12.8172	0.145859	20.5912	13.1037	1.11822	0.185005	0.0141232		0.754977	100.096		29.4449	167.672	625.631	37.064	187.782	9.57883	-104.935	32.0923	8.49317	10.2978	24.027		0.3167	164.232	637.335	0.137045	6.49462	37.1408	181.953	8.84176	19.9478	7.61054	2.5549	35.886	7.05845	11.4235	0.75158	0.147835	23.1748	4.00479	12.6637	1.72605	6.62967
Ben Strome	Lw16_Z14a	2	44.7921	0.416307	14.1594	8.93629	0.13066	17.2743	10.3478	2.71961	0.315178	0.0772146		0.509307	99.6781		26.7106	165.825	580.394	38.1227	329.4	16.024	262.115	318.871	10.0787	21.5498	106.783		0.405107	174.029	564.212	0.124584	7.43327	43.8559	310.436	20.4454	363.419	14.5601	3.74526	306.019	9.6071	22.9536	2.62595	0.217501	108.821	5.81187	14.959	1.95498	7.84365
Ben Strome	Lw16_Z15	3	45.5623	1.01013	13.6932	16.8241	0.33274	6.85169	13.6086	1.67086	0.181747	0.042069		0.73	100.507		59.5924	376.222	144.969	67.515	182.718	484.227	318.971	166.296	26.8427	32.323	22.3342		1.00586	375.223	168.831	0.374536	16.2591	70.3232	185.126	479.903	334.316	16.0526	5.13695	174.51	28.6387	34.3752	1.37713	0.209761	24.1602	1.36104	4.80715	0.977983	5.20881
Ben Strome	Lw16_Z2a	3	39.6921	1.78237	16.5614	14.6516	0.14339	8.38308	14.5065	2.03322	0.380937	0.123414		1.03772	99.2957		27.1558	307.979	70.1448	53.0285	208.745	821.291	211.015	699.717	12.6602	2.07826	66.4223		1.75213	303.55	71.5058	0.144036	14.0996	53.4062	228.71	827.309	231.453	20.4046	6.46731	733.375	13.2392	4.90274	1.33226	0.0810623	71.0957	4.53258	14.3097	2.58456	12.1502
Ben Strome	Lw16_Z2b	3	41.457	1.41857	12.7158	14.9477	0.180065	14.7747	10.9435	1.39522	0.353084	0.0960773		2.01805	100.3		28.5872	253.224	934.149	53.6025	753.092	191.141	86.5605	65.6209	14.1103	29.9688	104.564		1.39909	248.839	913.39	0.184146	13.2907	57.2987	780.953	183.066	78.3991	19.1889	5.84513	61.7708	13.8628	34.6	2.06427	0.182888	107.99	12.5087	35.9706	5.73311	22.8343
Ben Strome	Lw16_Z3	3	45.2592	0.670579	7.74857	12.5867	0.125215	19.1585	10.4243	1.31073	0.260396	0.073811		2.00251	99.6205		32.4106	162.416	1617.47	104.29	837.302	112.112	81.3855	100.428	12.6293	31.9358	40.253		0.662181	151.069	1638.09	0.127399	11.5735	103.888	893.172	116.376	69.6633	11.425	2.29245	100.24	12.8072	37.0295	1.82811	0.0380031	42.3178	7.23868	20.0894	3.24375	13.8524
Ben Strome	LW16-Y14	4	46.8539	0.650282	11.0524	11.9784	0.233595	12.8163	13.3254	0.995399	0.418005	0.00913042	0.167061	1.46233	99.9621		43.6231	219.878	1144.25	58.4885	348.538	42.9137	98.0533	45.0448	10.8372	29.992	71.1616		0.657885	224.074	1151.19	0.221871	10.5662	75.9535	382.4	41.6454	89.3328	12.2046	5.99828	48.5502	11.8255	24.9484	1.5554	0.434443	75.1642	9.97423	23.7421	2.71181	10.0072
Ben Strome	LW16-Y3E	4	48.6274	1.03489	15.2151	14.0086	0.203736	6.57842	12.2702	1.76294	0.125199	0.0617262	0.0289853	0.573152	100.49		47.5044	307.356	198.529	69.5444	146.515	35.7655	131.669	148.068	22.2887	48.4922	81.6098		1.02285	298.745	209.861	0.190208	10.7876	55.8556	139.874	36.5998	124.663	16.1092	2.18211	147.019	21.266	40.445	2.12981	0.155907	79.4284	2.03963	6.94089	1.16073	6.19159
Ben Strome	LW16-Y3F	4	46.3046	0.83806	12.6972	15.2553	0.226456	9.84275	13.1527	0.694301	0.0382959	0.0262491	0.0477389	0.317638	99.4413		50.9831	299.306	326.979	76.637	205.405	32.3197	191.271	61.3112	20.036	30.1217	42.4683		0.859337	289.299	337.73	0.217696	12.5704	69.3025	205.415	33.9549	190.545	13.78	0.721284	60.0447	19.881	31.9226	3.43909	0.0828954	41.6541	6.46518	17.7948	2.31542	9.60953
Ben Strome	LW16-Y4	4	48.9127	0.511008	11.1938	12.612	0.317512	8.09	16.432	0.896809	0.212717	0.0106582	0.10448	0.868072	100.162		50.2327	248.749	715.614	61.2442	288.003	7.35723	75.1068	56.3783	13.6599	26.6139	59.9164		0.508607	239.424	734.869	0.323836	13.5308	65.8415	278.828	2.91605	78.4923	11.1227	5.12826	54.7856	14.1324	20.6026	0.763858	0.17055	62.9807	0.94629	3.2697	0.557651	3.06598
Ben Strome	LW16-Z7	2	39.0386	0.927076	15.1606	15.3631	0.226615	15.1805	11.5109	1.42641	0.135214	0.0512702		0.469994	99.4903		41.3197	330.739	235.429	55.9113	311.98	31.3396	169.021	267.198	12.6613	11.9888	17.0935		0.920967	337.439	213.381	0.2471	15.3904	57.2552	324.222	33.2469	323.326	16.388	1.31232	270.249	12.7147	13.4566	0.927817	0.00107216	21.4425	2.51175	9.09237	1.52618	7.23133
Drumbeg	LW16-44	4	43.6334	0.321222	6.63672	11.536	0.17503	26.856	6.61728	0.623067	0.255008	0.0128149	0.402308	2.51391	99.5829		26.433	130.271	2755.54	56.3732	1077.7	14.8263	43.9892	51.3274	7.64673	15.8945	29.3516		0.338019	127.48	2783.54	0.176636	12.8625	101.249	1076.17	13.9935	45.1624	6.81523	8.65005	52.874	7.98409	19.4703	1.40038	0.688813	31.151	1.20416	2.86312	0.392172	2.04382
Drumbeg	LW16-45A	4	46.5462	0.429834	7.96087	11.3573	0.182547	24.5661	7.57975	0.661377	0.128822	0.0242487	0.405038	0.761942	100.604		28.4343	148.881	2774.23	54.146	995.981	57.9117	48.9099	66.7868	9.37139	22.0865	20.2648		0.442904	155.728	2772.25	0.179524	12.3742	96.5524	1016.09	64.4389	49.0669	8.88728	4.02384	73.7315	10.6335	28.0159	1.87683	0.727068	21.7983	1.32866	3.9108	0.57386	2.93924
Drumbeg	LW16-45B	4	44.193	0.341606	6.40413	11.8368	0.180518	26.904	7.46395	0.309862	0.0497118	0.0211624	0.421467	2.36326	100.49		25.8107	135.897	2886.76	58.6464	1141.5	105.557	59.8784	34.4508	7.3738	15.5939	11.8888		0.361413	134.182	2851.32	0.191028	9.98873	105.871	1139.81	98.7913	60.1673	7.39959	1.45877	36.5811	8.23019	18.3196	0.848833	0.284941	11.7229	0.922095	2.57632	0.369343	2.00277
Drumbeg	LW16-46A	5	43.125	0.300322	6.57939	12.0166	0.169536	27.1651	6.17872	0.302539	0.119474	0.0546369	0.401241	4.09894	100.511		26.9292	134.303	2748.22	56.4866	1119.1	218.847	90.3733	31.2114	7.57161	11.7192	19.6711		0.286539	128.19	2779.1	0.17654	11.831	60.7255	1110.6	204.334	84.1655	6.96517	4.71295	30.451	7.54589	12.1671	0.898125	0.330589	14.7634	0.85374	2.27051	0.332571	1.80604
Drumbeg	LW16-46B	5	42.984	0.31236	7.11892	11.7597	0.158014	27.0088	6.64232	0.495221	0.15876	0.0276905	0.409037	3.74164	100.816		27.9193	145.793	2801.62	56.4317	1100.23	71.3818	94.8448	38.4005	7.46971	11.6044	16.9787		0.303493	131.611	2884.23	0.168759	11.8801	53.9411	1065.99	79.5633	93.318	6.89164	5.58524	37.5984	7.382	11.8877	0.824184	0.36438	17.6604	0.879904	2.35263	0.350739	1.76573
Drumbeg	LW17-DB10	5	48.6449	0.846089	13.9841	11.1683	0.172836	9.96771	10.6059	2.24846	0.491681	0.252507	0.0455816	0.816367	99.2444		27.949	175.342	312.203	51.6146	206.486	309.208	153.633	423.651	22.5672	45.9524	111.023		0.828251	165.953	296.532	0.178235	9.96596	48.7058	213.566	315.564	145.041	17.3925	9.51412	430.609	22.6038	48.4635	1.99488	0.119283	110.615	17.4329	50.5884	8.05289	34.9674
Drumbeg	LW17-DB3B	5	40.8131	0.248551	5.41368	12.0628	0.179526	29.9653	5.13248	0.314905	0.221411	0.0238443	0.317601	5.31147	100.005		22.4599	110.372	2175.35	55.7406	1302.04	76.3928	136.223	28.6973	9.88212	9.74756	25.2008		0.281169	118.14	2099.2	0.197133	11.9657	56.5885	1366.87	77.7361	139.26	6.6189	8.21984	31.8428	10.5882	12.0966	0.755999	0.536748	28.0422	0.991185	3.24143	0.63507	3.66312
Drumbeg	LW17-DB4	5	41.776	0.228869	4.4315	10.9631	0.169749	29.7061	6.54847	0.405972	0.191325	0.0376583	0.31896	4.26078	99.0385		21.9921	101.752	2184.66	92.7294	1389	98.1271	114.601	39.7874	5.78456	7.06548	32.9543		0.243051	109.083	2168.31	0.191977	11.1769	93.3323	1423.03	95.4586	113.902	5.98922	7.73239	40.5827	6.15548	8.64327	0.763616	0.292434	35.5527	1.45933	3.13619	0.417213	1.81789
Drumbeg	LW17-DB7	5	44.974	0.637605	11.1901	11.1592	0.238721	20.4825	8.4177	0.991767	0.626924	0.0320225	0.120305	0.70837	99.5793		47.364	184.485	824.006	52.5582	861.599	110.916	75.8206	66.3024	32.408	45.4317	49.5959		0.676245	183.757	818.211	0.246112	11.0518	51.7667	908.253	107.514	85.0428	11.0394	16.9878	69.0269	32.461	47.6835	4.25204	0.585327	50.0458	3.73369	12.6463	2.1023	9.95737
Drumbeg	LW17-DB8	5	42.4476	0.262585	5.14595	10.6347	0.156129	29.0951	5.95588	0.445276	0.0872502	0.025454	0.337076	4.49666	99.0897		22.4632	113.807	2308.74	49.4295	1394.52	158.724	89.7435	22.7409	6.72943	10.1233	12.5975		0.262585	111.486	2310.01	0.166389	9.81051	53.7314	1396.74	150.624	97.2728	6.68846	7.78136	25.425	7.14026	11.2038	0.723215	0.391459	13.4873	1.28799	3.48959	0.53478	2.6489
Geodh' nan Sgadan	LW17-BCT12A	5	46.2799	1.62706	13.9762	15.9989	0.272802	7.93964	10.1409	2.49633	0.37204	0.230648	0.0241338	0.548074	99.9066		65.4366	281.972	165.3	76.2792	122.607	210.703	177.464	181.662	55.533	98.9744	85.6728		1.64378	271.154	159.742	0.276802	15.8996	75.709	127.937	213.382	168.786	19.1971	6.43571	188.137	54.8094	101.233	4.17868	0.122621	82.0175	29.9078	65.7472	8.10039	31.1114
Geodh' nan Sgadan	LW17-BCT3	5	44.408	0.154439	19.7547	7.69358	0.134234	13.5467	8.44319	1.34851	2.40433	0.0248242	0.0499014	2.447	100.409		9.34301	51.0221	341.79	36.8394	351.081	81.8714	101.396	99.8786	3.29893	8.94382	625.433		0.158307	55.3557	351.732	0.141729	7.78465	34.4985	382.201	85.2503	96.6325	10.9554	33.3503	100.639	3.68628	8.91615	0.328867	2.27994	619.596	1.06951	2.07972	0.272269	1.24186
Geodh' nan Sgadan	LW17-BCT4	5	48.7107	0.295243	14.5166	7.24852	0.121648	10.637	12.9209	1.78004	0.916139	0.0248345	0.262092	1.42938	98.863		37.6891	138.743	1795.15	33.9416	180.08	61.2033	105.236	167.218	7.10482	17.4607	252.691		0.287633	139.82	1810.42	0.114352	6.99294	31.8675	189.141	52.5626	108.975	11.3655	12.5692	165.144	7.02699	19.7049	0.685392	1.40572	245.328	4.19879	11.02	1.60905	6.7381
Geodh' nan Sgadan	LW17-BCT6	5	48.483	0.190245	17.3121	5.98872	0.103888	9.61342	11.683	1.28846	2.05328	0.019636	0.0055209	2.31835	99.0596		36.3627	125.346	37.8143	28.2556	155.209	77.7891	50.2635	128.771	5.82017	10.19	559.698		0.194912	121.933	42.1068	0.100612	5.89504	27.4816	166.005	74.5637	53.0734	12.1944	28.4898	129.662	5.62793	9.88537	0.880556	1.19709	545.197	3.47187	7.87667	1.03685	5.0376
Geodh' nan Sgadan	LW17-BCT8	5	53.1867	0.593742	16.0012	8.35171	0.131336	5.35672	10.6635	3.47114	0.261943	0.0822831	0.0456959	0.921566	99.0676		32.163	136.672	312.985	39.5826	75.5828	107.556	117.693	293.059	15.7137	34.9705	57.6045		0.601696	150.288	322.842	0.131055	8.54544	37.8812	82.7863	108.948	125.437	16.893	0.64648	304.527	16.2628	36.2901	2.90909	0.0861083	58.18	8.20448	19.9948	3.02941	12.5609
Gorm Chnoc	LW17-GC1	5	48.1402	0.218445	15.1848	7.39142	0.148696	13.7478	13.9305	1.03254	0.173541	0.0118486	0.131026	0.736467	100.847		39.0035	154.792	897.438	35.1911	114.795	112.679	60.7225	98.0545	6.82727	4.58816	7.84081		0.235436	152.225	914.055	0.160797	7.19616	36.3589	122.143	109.129	57.6314	12.2587	3.3296	100.801	7.35079	5.45769	0.19628	0.0706554	9.38229	0.892403	2.94603	0.517751	2.48976
Gorm Chnoc	LW17-GC2	5	44.6291	0.324693	6.70078	11.1094	0.190726	27.0104	6.73482	0.699731	0.0907511	0.0300139	0.343444	1.87792	99.7417		26.3837	133.745	2352.36	51.4457	1055.44	76.2368	101.053	52.1172	7.67075	17.122	22.9206		0.33477	120.967	2156.47	0.2011	10.4413	50.9028	1068.97	76.2162	101.989	7.29061	1.57058	52.689	7.77942	15.0914	0.641685	0.19491	20.5774	1.89431	4.01619	0.555854	2.47504
Gorm Chnoc	LW17-GC3	5	40.3186	0.204049	10.3765	14.8996	0.196513	24.1552	5.98223	0.950625	0.154967	0.0278309	0.0153339	1.87102	99.1525		15.3834	58.9887	105.027	40.5314	815.177	204.385	247.342	45.6776	6.03367	10.0807	19.6711		0.19209	53.4341	90.7273	0.171205	14.9764	38.814	791.273	224.821	242.056	7.07172	3.39806	42.4562	5.59703	11.1098	0.467399	0.104732	17.9046	1.66814	4.13203	0.538064	2.13714
Gorm Chnoc	LW17-GC4	5	47.3848	0.244414	14.0632	8.58951	0.167161	12.0969	13.9745	0.9353	0.0972973	0.0201624	0.0137015	1.36073	98.9476		47.5494	187.113	93.8457	39.8843	98.22	223.851	113.309	105.383	7.46514	4.04644	13.9992		0.243577	159.94	89.1641	0.154471	8.73112	37.7586	97.4225	219.45	108.076	10.6478	1.92369	104.792	7.31877	3.95113	0.283936	0.145608	11.0487	0.622428	2.12403	0.406975	2.03991
Gorm Chnoc	LW17-GC5	5	37.8988	0.1816	7.63482	15.3037	0.189644	26.5298	5.29011	0.932373	0.116711	0.0490761	0.0140138	5.28443	99.425		12.6958	50.2387	95.985	70.049	891.003	153.535	104.838	42.4353	4.0318	6.4143	20.9648		0.176547	49.9365	86.5855	0.185159	15.3986	72.2449	878.875	147.556	112.303	5.48495	1.2639	39.0728	4.28581	6.96926	0.32833	0.117154	19.1299	1.29497	2.46055	0.296691	1.32569
LEC	LW16-625	4	36.0381	0.138579	3.07832	12.6959	0.165406	35.4338	1.22461	0.0115266	0.00157136	0.00373401	0.728773	10.345	99.8652		12.1318	60.7454	4991.6	62.0762	1563.57	5.91479	64.0198	3.8734	2.43376	8.53312	9.79445		0.148922	62.9549	4877.11	0.17931	11.4698	148.923	1582.8	4.20542	59.7765	4.36282	0.178063	4.13402	2.73328	10.7606	0.60788	0.234349	9.44508	0.4582	1.43702	0.225178	1.0371
LEC	LW16-627C	4	40.1865	0.167373	3.99475	10.4646	0.146508	34.651	4.06087	0.29768	0.218133	0.0104685	0.361524	6.59106	101.151		18.019	81.8373	2476.19	51.9795	1548.06	22.5232	71.8359	17.6866	4.08699	12.2141	24.5993		0.162594	77.1493	2458.93	0.147221	11.7206	112.198	1529.22	20.5097	69.5356	4.3631	5.11057	17.591	4.2218	9.78057	0.610512	0.0393655	23.5324	0.681124	1.85099	0.246285	1.17823
LEC	LW16-629B	4	49.2309	0.356893	6.90959	10.7071	0.182355	25.7087	5.77848	0.677922	0.415755	0.0089507	0.347498	0.318788	100.643		24.7813	122.644	2380.13	52.5571	1019.87	4.33468	52.9642	48.6656	7.65789	16.1097	50.7584		0.356131	122.868	2345.26	0.18311	11.9939	90.4699	1020.8	5.37956	58.895	8.75264	9.8245	50.6021	8.14229	18.2024	1.50022	0.0527701	51.981	1.59636	5.77646	0.858828	4.26483
LEC	LW17-E1	5	41.3054	0.325155	7.00403	8.63654	0.137641	29.9186	8.29388	3.54617	0.147188	0.0143158	0.373365	0.535482	100.238		27.8405	134.355	2557.29	39.6613	728.812	89.7363	94.6952	40.5535	8.74005	19.6553	25.0607		0.327631	139.953	2488.74	0.1369	8.82014	36.0726	753.596	93.01	94.3759	17.565	2.59466	38.9532	8.65	17.3243	1.7885	0.194299	27.4582	2.83022	5.68644	0.76847	2.66946
LEC	LW17-E2A	5	43.3973	0.341869	7.64268	12.1915	0.170251	25.6633	7.40347	2.47773	0.152002	0.00879406	0.346837	1.43533	101.231		27.9384	134.623	2375.59	53.7278	4478.19	1038.11	147.492	38.5522	8.62438	13.5231	25.2481		0.341637	142.433	2388.55	0.176044	11.9716	55.3237	4346.33	1044.2	157.021	18.9016	6.42857	40.6978	9.00386	14.6423	1.93963	0.285068	29.017	3.48468	10.5074	1.6602	7.62658
LEC	LW17-E2B	5	43.6069	0.297927	6.68386	10.942	0.175108	27.689	6.58644	0.872933	0.102469	0.0191194	0.342802	1.59409	98.9127		27.0086	127.713	2347.96	52.1426	1076.33	68.4677	75.2623	33.6128	7.82304	14.1248	22.5897		0.305867	121.966	2329.43	0.182031	10.4643	50.6037	1055.99	70.4538	76.1255	7.84371	2.5188	34.2065	8.86457	14.1002	1.65782	0.216094	21.569	1.29541	4.05143	0.62056	2.94883
LEC	LW17-E2C	5	40.1123	0.236962	5.31982	12.6565	0.172846	31.6787	4.6618	0.710769	0.0995315	0.0183452	0.319499	4.16081	100.148		20.6435	101.694	2188.35	88.4824	1515.29	203.096	103.951	27.8531	5.4903	14.171	17.4074		0.250998	106.372	2144.63	0.184334	12.4799	90.121	1447.13	199.031	95.6837	7.01256	1.97553	28.2813	7.68338	15.0584	0.655068	0.148216	18.8742	1.16302	3.45647	0.562408	2.62504
LEC	LW17-E3	5	44.6303	0.282506	6.42923	11.6479	0.180271	28.6688	5.79389	0.74721	0.132475	0.015819	0.339488	1.69702	100.565		25.129	127.579	2325.26	93.7465	1212.15	307.419	110.171	30.067	6.60739	15.2016	23.2117		0.284987	128.185	2302.75	0.18804	11.4026	96.7188	1255.81	295.218	109.484	6.95053	2.32216	31.1614	7.29396	12.5942	0.5393	0.148429	23.8745	1.14777	3.23471	0.514853	2.43976
LEC	LW17-E5	5	43.4245	0.237111	5.38873	12.0398	0.186221	29.9502	4.59134	0.531522	0.100038	0.0193995	0.309272	3.20526	99.9834		20.8495	105.164	2118.3	55.7689	1345.96	82.03	101.163	23.7082	5.85285	12.2413	29.5448		0.26075	102.684	2162.61	0.203466	11.8501	53.5082	1436.15	89.9716	99.143	6.43407	2.51867	26.6008	6.36491	11.2909	0.359594	0.411896	32.2646	0.982573	2.7575	0.445937	2.03465
Loch an Daimh Mor	LEW014	1	49.6846	0.183094	3.58994	9.61959	0.154065	34.1161	0.612863	0.0436498	0.0556763	-0.00247178	0.140999	0.9759	99.174		11.555	49.8828	965.749	837.427	2810.19	265.42	49.874	5.05185	3.16733	4299.77	24.4954		0.168276	56.9957	944.863	0.152653	9.20158	85.9041	2834.71	247.199	44.881	7.99648	2.15768	5.27994	3.60855	4493.92	1.16508	0.276744	27.9465	0.321751	1.22184	0.161188	0.694306
Loch an Daimh Mor	UB CR-p2 (b)	0	41.65	0.0747999	1.88912	8.47607	0.112211	38.1865	0.884653	0.0262864	0.0075753	-2.63864e-05		10.0516	101.359		7.7854	40.6515	2189.75	44.0675	2683.59	25.2606	55.8387	5.55131	2.58541	6.10214	5.17075		0.0893146	36.7869	2166.5	0.106135	8.2904	105.783	2507.85	21.1659	59.1794	2.81514	0.297039	5.26972	2.46339	5.39045	0.237785	0.0485297	3.94588	1.88821	3.45521	0.461861	1.67041
Loch an Daimh Mor	UB Cr-p2(a)	0	43.077	0.0702388	2.09058	8.72554	0.124173	37.0657	0.796581	0.0333154	0.00304486	-0.00326033		9.39018	101.373		7.43942	44.4825	2517.53	44.086	2430.01	9.55995	53.2919	4.90125	1.5361	6.42692	2.95785		0.0848303	39.9392	2418.34	0.117946	8.38907	105.708	2378.73	2.3862	48.2595	3.42303	0.305579	4.71319	1.42322	6.36471	0.146258	0.0920465	2.2269	1.1571	1.86587	0.258167	0.871827
Loch an Daimh Mor	UB CR-p3	0	42.6941	0.18288	2.90072	8.59934	0.102925	35.7406	1.2127	0.133394	0.0726569	0.00161453		9.67948	101.32		10.2173	60.916	1159.6	43.5427	2493.04	6.49741	51.273	23.3481	3.54269	12.5764	11.9886		0.19318	58.1351	1199.69	0.100653	8.53662	97.2032	2441.35	3.61426	45.593	3.98297	0.713067	20.8758	3.32914	12.2701	1.01261	0.0751276	11.4396	3.26566	7.83636	1.24291	4.30555
Loch an Daimh Mor	UB Cr-Pcrid (1)	0	42.4604	0.0805751	1.98033	8.85078	0.117774	36.9781	0.447992	0.0231151	0.00865932	0.000758044		10.1881	101.137		7.92705	48.7209	1219.54	45.3376	2644.15	5.44938	70.7912	5.41975	1.85298	9.72006	2.75038		0.0908785	38.0687	1237.72	0.112702	8.43428	89.2109	2537.29	1.99	45.8108	3.73194	0.214353	4.96185	1.62783	9.53456	0.203795	0.117383	1.58747	2.26194	4.13208	0.626783	2.35509
North Scourie Bay	NSB u/m	0	47.6083	0.394281	7.42387	11.463	0.181249	21.3261	9.79794	0.96525	0.393817	0.00209065		1.036	100.592		30.9748	149.117	2394.38	57.5058	976.881	73.6662	62.9305	43.303	9.62841	27.8191	30.7567		0.374824	140.563	2301.19	0.166818	10.8564	73.6497	894.693	71.8027	56.5735	8.87156	6.28958	37.4742	9.07283	25.3001	1.55717	0.0509731	27.7567	3.44853	7.92469	1.20327	4.76448
Scouriemore	LW16-639A	4	44.4109	0.234365	5.28198	12.0264	0.194097	27.5432	6.8104	0.385034	0.135585	0.0163102	0.426891	2.77731	100.243		21.444	109.804	2923.91	57.3295	1283.68	72.9086	104.066	61.5361	5.96065	12.4376	33.2479		0.264893	117.152	2945.84	0.200924	10.7661	122.441	1325.08	73.4634	100.406	7.05473	6.07154	66.0193	6.35173	14.5097	0.805483	0.320214	35.7255	1.40713	3.84129	0.529232	2.48792
Scouriemore	LW16-643B	4	42.2005	0.230773	4.61455	12.6555	0.169176	30.2429	6.18966	0.449253	0.0963132	0.00964627	0.376013	3.87992	101.114		20.3177	91.5666	2575.43	58.9117	1522.12	17.7264	99.0707	25.0398	6.2054	12.8802	18.2064		0.243405	96.4328	2582.1	0.166121	10.2641	120.704	1546.57	15.269	96.9277	6.23968	2.06049	26.6759	6.51483	15.9008	1.14876	0.103271	18.4868	0.784386	2.72381	0.442071	2.21983
Scouriemore	LW16-657	4	47.2358	0.358018	6.8431	10.8351	0.175182	22.6031	8.48562	0.789325	0.831104	0.0312819	0.37003	1.46643	100.024		29.545	122.095	2534.45	51.3265	981.078	15.8078	106.37	29.7566	13.6251	130.791	53.9796		0.357588	118.655	2673.23	0.170292	11.4282	79.3029	942.454	15.6752	108.391	9.05721	23.8922	28.5671	13.1338	135.981	3.7361	0.617048	53.2818	8.50643	21.8873	2.66833	10.3425
Scouriemore	TZ 110-115	0	43.0794	0.440724	8.48382	13.3672	0.108147	21.4432	10.9749	0.919208	0.494165	0.0328921		0.432718	99.7764		34.25	204.476	2243.85	64.3035	796.67	64.7921	77.3824	114.206	10.1965	16.081	292.929		0.472909	209.86	2208.35	0.106841	3.33449	99.1017	781.428	62.3002	73.2259	11.0292	36.009	126.801	11.7544	18.8191	2.12993	0.4735	289.929	2.79352	6.22031	0.890447	3.67929
Scouriemore	TZ 145-150	0	46.5757	0.415054	8.53157	12.0997	0.139078	19.0686	10.1588	0.877988	0.496711	0.0101186		0.471843	98.8452		35.7458	188.173	2484.56	61.6198	660.787	65.3266	75.148	116.735	10.7022	16.0232	177.061		0.41423	186.158	2381.32	0.140231	5.79244	83.9353	658.686	66.0472	68.8933	9.58601	26.1925	114.925	10.7236	14.1362	0.985768	0.417383	172.514	1.67891	3.82147	0.570031	2.68843
Scouriemore	TZ 160-167	0	44.4897	0.23851	5.65427	12.0553	0.121971	27.3563	6.61376	0.336113	0.116974	0.0156788		3.20269	100.201		24.3016	122.995	2614.65	61.8114	1252.16	27.8346	97.5753	44.3959	5.52984	14.2484	42.584		0.233106	117.065	2598.24	0.106578	5.86236	105.978	1218.59	21.524	96.0585	7.53363	7.21178	40.9593	5.45823	14.6794	0.518821	0.166594	40.9997	0.773471	1.73451	0.24815	1.21869
Scouriemore	TZ 190-195	0	44.0266	0.374261	7.78879	11.7403	0.087533	19.1761	13.9732	0.853377	0.356023	0.00285394		1.374	99.753		38.5915	174.617	3124.87	59.8465	838.955	12.8642	90.018	114.045	9.78384	19.6042	87.893		0.370558	170.509	3175.68	0.0920265	5.92676	86.063	828.031	9.80154	88.5252	9.66725	17.7197	106.123	9.96621	19.0588	0.931524	0.301643	84.2103	1.51932	4.50388	0.693834	2.91032
Scouriemore	TZ 220	0	44.9339	0.483628	9.08727	12.347	0.138798	21.956	8.05124	1.09353	0.448726	0.00596714		0.760925	99.307		31.7608	190.888	3329.49	63.6539	1074.98	17.8295	78.6584	98.8733	9.77679	45.1741	101.048		0.470391	188.753	3342.19	0.139824	6.01738	85.1026	1072.09	13.3455	77.3732	10.9295	22.8827	94.1623	9.91795	42.9175	1.7368	0.458235	99.4024	1.96139	5.27473	0.903184	3.92894
Scouriemore	TZ 225-230	0	47.554	0.237736	5.31854	10.4608	0.10037	26.2976	9.215	0.461059	0.0975786	0.00600445		0.687936	100.437		26.9193	118.956	1830.35	49.8927	835.523	47.8673	67.592	38.0196	5.85608	27.9566	34.4273		0.261194	122.271	1885.83	0.0991533	7.64333	72.114	795.389	42.3883	64.527	7.81912	5.48666	40.4167	6.56846	28.9859	0.680642	0.13638	29.7764	1.29121	3.43821	0.589435	2.62706
	Duplicates - analysed		SiO2	TiO2	Al2O3	Fe2O3	MnO	MgO	CaO	Na2O	K2O	P2O5	Cr2O3	LOI	Total		Sc	V	Cr	Co	Ni	Cu	Zn	Sr	Y	Zr	Ba		49TiO2	51V	52Cr	55MnO	57Fe2O3	59Co	60Ni	65Cu	66Zn	71Ga	85Rb	88Sr	89Y	90Zr	93Nb	133Cs	137Ba	139La	140Ce	141Pr	146Nd
			wt. %	wt. %	wt. %	wt. %	wt. %	wt. %	wt. %	wt. %	wt. %	wt. %	wt. %	wt. %	wt. %		ppm	ppm	ppm	ppm	ppm	ppm	ppm	ppm	ppm	ppm	ppm		ppm	ppm	ppm	wt. %	wt. %	ppm	ppm	ppm	ppm	ppm	ppm	ppm	ppm	ppm	ppm	ppm	ppm	ppm	ppm	ppm	ppm
	LW17-DB8 duplicate	5	42.0941	0.270946	5.31004	10.6524	0.157442	29.5405	5.94642	0.428205	0.101038	0.0279014	0.334751	4.49666	99.3604		23.4367	114.258	2292.81	48.4381	1294.51	153.246	94.9548	23.3215	6.37409	9.45656	13.5866		0.278343	114.756	2254.24	0.171622	10.19	47.303	1304.77	160.702	97.0457	6.93403	8.26396	25.824	7.43275	9.80047	0.66487	0.413818	14.2427	1.41029	3.56985	0.542686	2.48417
	NSB u/m duplicate	0	47.6047	0.394406	7.47391	10.8715	0.176647	21.8442	9.60129	0.975052	0.379642	-0.000585264		1.036	100.357		32.336	148.424	2419.17	58.3697	992.637	78.2598	70.5098	43.1089	9.69655	22.8216	31.6168		0.384196	144.648	2428.06	0.170525	11.1267	77.3782	946.414	83.0943	64.7609	9.27826	6.66739	39.0052	9.64787	23.8185	1.59634	0.0563227	30.5442	3.58362	8.24304	1.27058	4.98514
	Standards - analysed		SiO2	TiO2	Al2O3	Fe2O3	MnO	MgO	CaO	Na2O	K2O	P2O5		LOI	Total		Sc	V	Cr	Co	Ni	Cu		Sr	Y	Zr	Ba		49TiO2	51V	52Cr	55MnO	57Fe2O3	59Co	60Ni	65Cu	66Zn	71Ga	85Rb	88Sr	89Y	90Zr	93Nb	133Cs	137Ba	139La	140Ce	141Pr	146Nd
	BIR-1	3	47.2427	0.95446	15.2249	11.3013	0.170133	9.89245	13.1599	1.78595	0.0158321	0.0299744		-0.37	99.4076		44.5906	308.613	383.716	50.3594	179.379	105.381		110.249	16.7133	14.0941	4.02518		0.936391	308.768	391.283	0.16586	9.58931	49.774	177.642	113.379	65.1982	13.615	0.415642	100.49	15.0662	16.048	0.904411	0.00691866	4.94688	0.517127	1.59349	0.307464	1.98279
	JA2	2	57.8563	0.694401	15.5325	6.51556	0.102948	7.99855	6.59468	3.34314	1.81924	0.178087		0.55	101.185		18.2448	126.131	466.026	27.1142	119.765	26.3212		273.144	18.9613	114.646	317.323		0.696101	129.731	458.565	0.106751	6.88556	26.582	119.45	26.7498	59.1904	15.6291	69.3043	258.735	17.838	114.646	8.76359	4.65036	329.291	15.3627	33.2219	3.80384	13.7229
	JA2 (2)	0	55.9818	0.683412	16.0644	6.95819	0.107086	7.49687	6.39101	3.12375	1.7997	0.150293		0.55	99.3065		19.8734	130.388	416.045	31.3302	148.028	25.2514	61.0422	256.53	17.8087	124.083	318.367		0.654399	133.684	426.189	0.104859	6.10187	28.7074	133.351	26.0635	59.5535	17.3421	70.4872	251.324	17.3014	120.269	8.75401	4.48124	315.367	16.6309	33.4913	3.94923	13.42
	JB1a	5	52.3029	1.27143	14.0175	8.96592	0.148172	7.63472	9.15952	2.76373	1.47513	0.277564	0.0601215	0.78	98.8567		27.9049	208.665	411.791	41.2884	131.158	58.3984	82.0119	436.796	24.3653	145.363	502.827		1.29921	215.667	387.452	0.145603	9.08325	38.1234	136.904	78.9364	78.2813	16.5812	40.5801	428.923	23.7511	136.093	26.1329	1.06205	478.246	37.929	64.602	7.28739	25.4391
	JB1a(2)	0	52.1707	1.3198	14.4907	9.04872	0.146326	7.86777	9.42596	2.71665	1.43081	0.258288		0.78	99.6557		28.4327	210.882	417.616	44.8002	138.863	55.0803	78.0983	449.256	24.3723	144.231	487.102		1.28789	205.902	424.753	0.154783	9.17603	39.6436	148.92	60.2914	79.7356	19.5255	39.4179	448.072	24.7996	143.681	27.8675	1.16689	496.01	38.4457	65.842	7.4764	24.6993
	JB1b	1	52.2169	1.29811	14.4707	9.17112	0.163278	7.74155	9.29208	2.62695	1.43657	0.253847		0.78	99.5105		29.4176	212.488	406.691	37.7445	132.837	57.8768		451.069	23.914	140.402	504.242		1.29382	214.922	423.964	0.153799	9.13627	38.5099	140.48	53.8926	89.2782	18.7031	39.1928	449.14	24.1501	142.858	26.9505	0.877269	497.654	39.1874	66.4855	7.32402	25.5604
	JG1A	1	71.9703	0.271035	14.3058	1.98988	0.0569542	0.651537	2.09719	3.42229	3.98492	0.0803195		0.5	99.3327		5.69499	19.9312	17.003	5.61126	16.6215	2.06383		183.46	33.3822	122.219	472.221		0.256107	18.4913	14.2995	0.05871	1.88359	3.89207	27.6127	2.56735	40.0534	17.4719	178.23	178.073	33.3822	118.299	11.6906	10.7371	461.243	20.8705	44.743	5.87041	20.1898
	JG3	2	66.9733	0.462815	15.1959	3.74111	0.0767583	2.3416	3.81433	4.19122	2.54904	0.150742		0.55	100.047		8.56836	80.7111	32.8941	10.2699	11.217	5.92768		371.594	17.3974	145.11	470.187		0.468035	76.4001	31.5148	0.0678062	3.23236	10.2141	25.3348	9.04249	45.2144	15.7024	61.8977	376.171	16.369	145.11	5.02743	1.67833	460.151	18.0612	38.5681	4.32016	14.8528
	JG3 (2)	3	67.6594	0.476006	15.1576	3.62475	0.0710785	1.64406	3.72812	4.02354	2.63763	0.115363		0.33	99.4676		7.96236	68.6334	18.9581	11.0822	23.1989	3.61324		382.557	18.0235	146.378	444.171		0.466261	65.1375	23.9089	0.0698443	3.16013	11.0829	25.1949	4.29901	56.7972	15.0541	59.0382	368.566	16.9296	142.936	5.63711	1.77216	438.987	18.9886	37.1865	4.27859	15.4082
	JG3 (3)	4	67.7952	0.469359	15.3149	3.64366	0.0708199	1.50241	3.7345	4.03006	2.70898	0.124952		0.33	99.727		8.18909	62.1411	15.429	16.8767	15.1243	6.15174		369.622	16.5329	145.224	464.242		0.494722	65.9499	13.1386	0.0701758	3.69611	12.5458	13.4093	11.4921	42.1746	16.3379	64.8523	381.35	17.5093	148.97	5.45275	1.84841	470.191	21.0456	40.5239	4.75881	17.0132
	JP1	1	41.9864	0.00404036	0.620112	8.2497	0.00542715	44.2147	0.568505	0.0363104	0.013363	0.000273357		3.02	99.1585		6.97592	23.3174	3011.66	114.127	2547.13	4.10657		1.4894	0.158684	4.88009	10.4259		0.0028792	22.7728	2985.47	0.115436	7.80434	108.13	2588.4	4.47846	27.1216	0.611293	0.495353	2.1801	0.140319	1.1098	0.314636	0.045245	11.5201	0.0426946	0.174154	0.0227768	0.097282
	JP1 (2)	2	41.9518	0.0103559	0.693401	8.53274	0.133013	45.0699	0.623259	0.066405	0.0123916	0.00334781		2.63	99.7266		7.85619	35.7061	3088.41	109.787	2383.88	7.84305		7.4597	0.556569	5.02648	11.8858		0.00784207	28.2314	2983.54	0.112558	8.48422	104.084	2326.67	4.5643	29.4019	0.929313	0.589358	5.91489	0.287062	5.58363	0.237922	0.00231465	12.9605	0.228289	0.468726	0.0565037	0.232708
	JP1 (3)	3	42.6783	0.00327591	0.644393	8.4824	0.121317	45.4089	0.493629	0.0128507	0.0023961	0.00846114		3.02	100.876		6.57592	21.9169	2984.32	108.089	2383.02	15.0312		1.09099	0.181123	0.94683	5.35037		0.00717278	23.5733	2968.56	0.118694	7.44755	106.401	2436.34	17.5424	28.7046	0.655137	0.12436	1.96642	0.172814	2.13996	0.959132	0.0367626	5.7784	0.228289	0.468726	0.0565037	0.232708
	MRG1	4	39.9219	3.785	8.26431	17.6578	0.175064	13.3903	15.0009	0.745091	0.189605	0.0564663		1.02	100.269		52.1091	530.133	431.654	87.0316	202.789	135.708		258.403	13.7797	103.548	56.8591		3.87422	506.689	436.784	0.176353	17.7402	89.0896	193.325	140.488	197.213	17.0127	5.98789	254.895	12.8843	110.72	19.21	0.49992	57.8843	9.79686	26.3391	3.52708	18.8393
	MRG1	5	38.7553	3.80402	8.4336	18.0193	0.175321	13.8681	14.6231	0.727458	0.188995	0.0658068	0.0633183	1.02	99.7444		54.2376	534.222	433.687	85.3178	180.97	143.915	196.195	274.661	14.5529	104.873	58.5682		3.79507	541.666	241.437	0.187802	17.8754	85.5017	174.473	131.483	189.09	18.1421	7.87761	263.3	13.8327	106.368	18.7889	0.573011	54.6427	9.66372	25.9131	3.51311	18.8915
	NIM-P	4	51.464	0.181037	3.71578	12.476	0.223687	26.248	2.56079	0.26376	0.0707646	0.0166736		0.39	101.118		26.5082	237.549	24021.1	60.6159	559.012	12.186		29.306	3.98113	8.34238	43.4186		0.186749	243.346	24295.2	0.225205	12.5722	110.243	556.729	10.5348	103.983	7.14018	2.14907	30.6491	4.13264	9.81621	0.504222	0.0890081	39.4015	1.82456	3.81144	0.441674	1.77484
	NIM-P (2)	0	51.5287	0.169632	4.1778	12.6519	0.226121	26.1332	2.61628	0.363922	0.0770146	0.0133282		0.39	98.3478		29.0223	241.311	24586.7	65.4282	569.012	22.2795	104.84	32.9469	3.00789	10.1297	40.2421		0.181867	255.599	24065.9	0.219244	6.43341	105.908	546.568	11.2561	108.634	8.53507	3.99858	32.9469	3.08209	18.4096	0.499162	0.135221	39.587	1.71727	3.51572	0.475202	1.71206
	SDO1	3	48.9933	0.707859	12.0969	9.42602	0.0390783	1.49889	1.03681	0.383569	3.53655	0.0894727		22.96	100.768		12.1742	158.177	63.0264	45.6862	96.5904	59.6469		73.6306	46.5027	174.777	396.293		0.71895	153.856	64.7119	0.0409718	9.56613	47.1415	102.018	69.8852	65.2869	17.4492	133.321	78.7098	45.1077	170.889	15.0472	7.22842	403.384	38.1245	73.8897	9.56603	36.2978
	GP13	1	47.1531	0.130575	3.79422	9.46806	0.121722	34.7951	2.77052	0.311908	0.0129207	0.0108436		1	99.569		16.5501	62.1405	2347.75	49.0969	1990.07	25.5583		11.0424	3.60566	3.34585	2.94734		0.127827	70.1999	2393.72	0.132177	8.48356	97.9158	1999.53	29.9105	35.831	3.19918	0.332186	9.72324	3.07028	5.69135	0.129597	0.0574697	0.822235	0.201221	0.588674	0.104757	0.656717
	Certified/Preferred values		SiO2	TiO2	Al2O3	Fe2O3	MnO	MgO	CaO	Na2O	K2O	P2O5	LOI	Total		Sc	V	Cr	Co	Ni	Cu	Sr	Y	Zr	Ba		49TiO2	51V	52Cr	55MnO	57Fe2O3	59Co	60Ni	65Cu	66Zn	71Ga	85Rb	88Sr	89Y	90Zr	93Nb	133Cs	137Ba	139La	140Ce	141Pr	146Nd	147Sm	153Eu
	BIR-1		47.77	0.96	15.35	11.26	0.171	9.68	13.24	1.75	0.027	0.046	-0.37	99.884		44	313	382	51.4	166	126	108	16	15.5	7		0.96	313	382	0.171	11.26	51.4	166	126	71	16	0.25	108	16	15.5	0.6	0.005	7	0.62	1.95	0.38	2.5	1.1	0.54
	JA2		56.18	0.67	15.32	6.95	0.11	7.68	6.48	3.08	1.79	0.15	0.8	99.21		19.6	130	465	30	142	28.6	252	18.1	119	317		0.67	130	465	0.11	6.95	30	142	28.6	62.7	16.4	68	252	18.1	119	9.8	4.2	317	16.3	32.7	4.38	13.8	3.12	0.94
	JB1a		52.16	1.3	14.51	9.1	0.15	7.75	9.23	2.74	1.42	0.25	0.78	99.4506		27.9	206	415	39.5	134	55	443	24	146	497		1.3	206	415	0.15	9.1	39.5	134	55	82	18	42	443	24	146	27	1.2	497	38.1	66.1	7.3	25.5	5.02	1.47
	JG1a		72.19	0.25	14.22	2.05	0.06	0.69	2.13	3.41	4.01	0.08	0.5	99.5927		6.3	23	18.6	5.7	6.4	1.3	185	31.6	121	458		0.25	23	18.6	0.06	2.05	5.7	6.4	1.3	38.8	17	180	185	31.6	121	12	11.4	458	21.8	45.2	6.08	21	4.85	0.72
	JG3		67.1	0.48	15.52	3.73	0.072	1.79	3.76	4.03	2.63	0.12	0.33	99.562		8.93	73	23.6	11.4	13	6	372	17.2	143	453		0.48	73	23.6	0.072	3.73	11.4	13	6	44.8	17	66	372	17.2	143	5.6	1.9	453	20.7	40.1	4.72	16.8	3.41	0.91
	JP1		42.39	nda	0.62	8.34	0.12	44.72	0.56	0.021	0.003	nda	3.02	100.228		7	29	2970	116	2460	5.7	nda	nda	6.3	17		nda	29	2970	0.12	8.34	116	2460	5.7	29.5	0.5	nda	nda	nda	6.3	1.2	nda	17	0.1	0.2	0.02	0.07	0.02	0.0033
	MRG1		39.12	3.74	8.47	17.94	0.17	13.55	14.7	0.74	0.18	0.08	1.02	99.7728		55	526	430	87	193	134	266	14	108	61		3.77	526	430	0.17	17.94	87	193	134	191	17	8.5	266	14	108	20	0.57	61	9.8	26	3.4	19.2	4.5	1.39
	NIM-P		51.7	0.2	4.18	12.76	0.22	26.33	2.66	0.37	0.09	0.02	0.39	102.424		29	230	24000	110	560	18	32	5	30	46		0.2	230	24000	0.22	12.76	110	560	18	100	8	5	32	5	30	nda	nda	46	2	nda	nda	nda	nda	0.2
	SDO1		49.28	0.71	12.27	9.34	0.04	1.54	1.05	0.38	3.35	0.11	22	100.07		13.2	160	66.4	46.8	99.5	60.2	75.1	40.6	165	397		0.72	160	66.4	0.04	9.34	46.8	99.5	60.2	64.1	16.8	126	75.1	40.6	165	11.4	6.9	397	38.5	79.3	8.9	36.6	7.7	1.6
	GP13 (Ottley et al. 2003)		nda	0.12	nda	nda	0.122	nda	nda	nda	nda	nda				15	66.3	2420	97.9	2030	23.4	11.2	3.31	5.35	nda		0.12	66.3	2420	0.122	nda	97.9	2030	23.4	nda	2.51	0.32	11.2	3.31	5.35	0.14	0.06	nda	0.19	0.59	0.11	0.65	0.243	0.105
	GP13 (Pearson et al. 2004)		44.91	0.14	3.45	9.09	0.15	39.79	3.01	0.3	nda	nda	nda
	JP1 (Babechuk et al. 2010)															6.73	22.67	2918	110.5	2201	4.094	0.659	0.089	5.278	9.609			22.67	2918			110.5	2201	4.094	45.11	0.526	0.297	0.659	0.089	5.278	0.035	0.0376	9.609	0.02747	0.0609	0.0071	0.031	0.0075	0.002
	*certified values from Govindaraju (1994) unless stated
	Blanks (analysed)		SiO2	TiO2	Al2O3	Fe2O3	MnO	MgO	CaO	Na2O	K2O	P2O5				Sc	V	Cr	Co	Ni	Cu	Sr	Y	Zr	Ba		49TiO2	51V	52Cr	55MnO	57Fe2O3	59Co	60Ni	65Cu	66Zn	71Ga	85Rb	88Sr	89Y	90Zr	93Nb	133Cs	137Ba	139La	140Ce	141Pr	146Nd	147Sm	153Eu
	GG Blank1	1	0.153401	0.00462065	0.0813946	0.0860535	0.00373207	0.236009	0.15153	0.0105783	0.00144741	0.000552989				0.68	0.57	1.39	0.82	12.2	0.79	0.83	0.045	0.375	0.95		0.002	0.58	1.83	0.003	0.0768	0.6746	10.06	0.52	2.69	0.141	0.118	0.713	0.084	0.35	0.0167	0.0233	0.703	0.021	0.045	0.0044	0.033	0.003	0.003
	GG BLANK2	2	0.0103049	0.0044	0.0784	0.0659	0.003674	0.30486	0.09583	0.00583	0.0010583	0.000176				0.8594	1.0103	3.49304	0.66483	5.79606	1.00439	0.556859	0.03685	0.664839	0.5796		0.0035	0.955989	4.3714	0.00283486	0.0764214	0.546902	4.83069	1.29642	2.17863	0.178412	0.0648353	0.377624	0.0337165	0.714266	0.0115428	0.0129765	0.597465	0.0197578	0.0640197	0.00692292	0.0310469	0.00451055	0.00488973
	GG Blank3	3	0.00959393	0.0057391	0.110285	0.09643	0.002795	0.24787	0.105904	0.008905	0.00200493	0.000194				0.793	0.76849	1.54835	0.37965	9.58403	0.73294	1.05904	0.029033	0.54303	1.05869		0.0041	0.703	1.71	0.003	0.0876	0.68442	4.3	0.39	3.27	0.153	0.076	0.856	0.0211	0.647	0.026	0.0153	0.9792	0.015	0.048	0.0045	0.0129	0.0027	0.0015
	Precision, calculated using the analyses of standard JP1 from 3 different batches
	Sample	Batch	SiO2	TiO2	Al2O3	Fe2O3	MnO	MgO	CaO	Na2O	K2O	P2O5	LOI	Total		Sc	V	Cr	Co	Ni	Cu	Sr	Y	Zr	Ba		49TiO2	51V	52Cr	55MnO	57Fe2O3	59Co	60Ni	65Cu	66Zn	71Ga	85Rb	88Sr	89Y	90Zr	93Nb	133Cs	137Ba	139La	140Ce	141Pr	146Nd	147Sm	153Eu
	JP1	1	41.9864	0.00404036	0.620112	8.2497	0.00542715	44.2147	0.568505	0.0363104	0.013363	0.000273357	3.02	99.1585		6.97592	23.3174	3011.66	114.127	2547.13	4.10657	1.4894	0.158684	4.88009	10.4259		0.0028792	22.7728	2985.47	0.115436	7.80434	108.13	2588.4	4.47846	27.1216	0.611293	0.495353	2.1801	0.140319	1.1098	0.314636	0.045245	11.5201	0.0426946	0.174154	0.0227768	0.097282	0.0292148	0.007886
	JP1 (2)	2	41.9518	0.0103559	0.693401	8.53274	0.133013	45.0699	0.623259	0.066405	0.0123916	0.00334781	2.63	99.7266		7.85619	35.7061	3088.41	109.787	2383.88	7.84305	7.4597	0.556569	5.02648	11.8858		0.00784207	28.2314	2983.54	0.112558	8.48422	104.084	2326.67	4.5643	29.4019	0.929313	0.589358	5.91489	0.287062	5.58363	0.237922	0.00231465	12.9605	0.228289	0.468726	0.0565037	0.232708	0.0520671	0.0132034
	JP1 (3)	3	42.6783	0.00327591	0.644393	8.4824	0.121317	45.4089	0.493629	0.0128507	0.0023961	0.00846114	3.02	100.876		6.57592	21.9169	2984.32	108.089	2383.02	15.0312	1.09099	0.181123	0.94683	5.35037		0.00717278	23.5733	2968.56	0.118694	7.44755	106.401	2436.34	17.5424	28.7046	0.655137	0.12436	1.96642	0.172814	2.13996	0.959132	0.0367626	5.7784	0.228289	0.468726	0.0565037	0.232708	0.0520671	0.0132034
	Mean		42.2055	0.00589074	0.652635	8.42162	0.0865855	44.8978	0.561798	0.038522	0.00938355	0.00402744	2.89	99.9203		7.13601	26.9801	3028.13	110.668	2438.01	8.9936	3.3467	0.298792	3.6178	9.22069		0.00596468	24.8592	2979.19	0.115563	7.91204	106.205	2450.47	8.86173	28.4094	0.731914	0.403024	3.3538	0.200065	2.94446	0.503897	0.0281074	10.0863	0.166424	0.370536	0.0452614	0.187566	0.0444497	0.011431
	Sd dev		0.4098	0.00388582	0.0373332	0.150992	0.0705281	0.615423	0.0650746	0.0268456	0.00607077	0.00413599	0.225167	0.874932		0.654977	7.58925	53.9629	3.11419	94.5035	5.55244	3.56753	0.223523	2.31429	3.43036		0.00269298	2.94775	9.25351	0.00306994	0.526661	2.03018	131.435	7.51783	1.16849	0.172352	0.245864	2.22054	0.0770738	2.34291	0.396107	0.0227363	3.79964	0.107153	0.170071	0.0194723	0.0781883	0.0131938	0.00307002
	% RSD		0.970963	65.965	5.72037	1.79292	81.4548	1.37072	11.5833	69.689	64.6959	102.695	7.79123	0.87563		9.17849	28.129	1.78205	2.814	3.87626	61.7377	106.599	74.8089	63.9694	37.2029		45.1488	11.8578	0.310605	2.65651	6.65645	1.91157	5.36367	84.8348	4.11305	23.5482	61.0049	66.2095	38.5244	79.5698	78.6087	80.8906	37.6713	64.3855	45.8987	43.0218	41.6857	29.6826	26.8571
	certified values		42.39	nda	0.62	8.34	0.12	44.72	0.56	0.021	0.003	nda	3.02	100.228		7	29	2970	116	2460	5.7	0.6921	0.09088	6.3	17		nda	29	2970	0.12	8.34	116	2460	5.7	29.5	0.5	0.3052	0.6921	0.09088	6.3	1.2	0.033	17	0.1	0.2	0.02	0.07	0.02	0.0033
	Babechuk et al. (2010)															6.73	22.67	2918	110.5	2201	4.094	0.659	0.089	5.278	9.609			22.67	2918			110.5	2201	4.094	45.11	0.526	0.297	0.659	0.089	5.278	0.035	0.0376	9.609	0.02747	0.0609	0.0071	0.031	0.0075	0.002
	References
	Ottley, C. J.; Pearson, D. G.; Irvine, G. J. A routine method for the dissolution of geological samples for the analysis of REE and trace elements via ICP-MS. In Plasma Source Mass Spectrometry: Applications and Emerging Technologies; 2003; pp. 221–230.
	Govindaraju, K. Compilation of working values and samples description for 383 geostandards. Geostand. Newsl. 1994, 18.
	Babechuk, M. G.; Kamber, B. S.; Greig, A.; Canil, D.; Kodolányi, J. The behaviour of tungsten during mantle melting revisited with implications for planetary differentiation time scales. Geochim. Cosmochim. Acta 2010, 74, 1448–1470, doi:10.1016/j.gca.2009.11.018.
	Pearson, D. G.; Irvine, G. J.; Ionov, D. A.; Boyd, F. R.; Dreibus, G. E. Re-Os isotope systematics and Platinum Group Element fractionation during mantle melt extraction : A study of massif and xenolith peridotite suites. Chem. Geol. 2004, 208, 29-59.
[truncated: 40 more columns]

## Sheet: bulk-rock PGE
Locality	Sample	Batch no.	Os	Ir	Ru	Rh	Pt	Pd	Au
			ppb	ppb	ppb	ppb	ppb	ppb	ppb
Ben Auskaird	LEW001	1	0.056881	0.123568	0.158246	0.673005	10.0993	6.86793	1.20702
Ben Auskaird	LEW004	1	0.0198232	0.0243572	0.0711446	0.0959679	1.75521	0.533971	1.44519
Ben Strome	LEW007	1	0.0849321	0.172501	0.442204	0.307907	4.06178	0.67532	8.08976
Ben Strome	LEW008	1	0.0745031	0.0998043	0.237039	0.2517	2.40946	2.10841	0.881463
Ben Strome	LEW009	1	0.125384	0.237859	0.50318	0.468661	3.27535	9.90898	3.03837
Ben Strome	LEW013	1	0.40583	0.494739	0.790981	0.617557	4.35359	4.33314	1.21021
Ben Strome	LW16-Y8B	2	0.641271	1.00362	3.59607	1.16623	13.7966	13.3822	1.69108
Ben Strome	LW16-Y10E	2	1.3449	1.70203	3.59803	0.42255	2.10493	0.886897	1.66123
Ben Strome	LW16-Y12B	2	0.416837	0.480816	1.46575	0.847176	9.57843	6.35071	0.74553
Ben Strome	LW16-Y10C	2	0.357765	0.626502	1.4657	0.789121	7.13559	8.56707	1.03978
Ben Strome	LW16-Z11D	2	0.281873	1.0225	0.932335	0.92187	5.01662	2.67776	2.91526
Ben Strome	LEW010	1	0.0186597	0.0316124	0.126287	0.119844	0.710448	1.05457	4.36084
Ben Strome	LEW011	1	0.0319637	0.0253255	0.101588	0.0732463	0.346865	0.751141	2.20001
Ben Strome	LEW012	1	0.0775145	0.0565552	0.137746	0.126848	2.67184	3.26202	32.2377
Ben Dreavie	LW17-BD1	3	1.08484	1.12037	5.54482	1.16243	25.0171	4.86067	1.99625
Ben Dreavie	LW17-BD2	3	0.577213	1.08428	3.59625	1.39422	15.3315	11.4427	8.89902
North Scourie Bay	NSB-um	1	0.645045	0.66456	3.85699	1.32001	6.60442	8.55817	3.07331
Scouriemore	T2_160-167	1	0.643503	0.88894	3.75174	1.52763	11.9811	9.67082	1.98773
Scouriemore	T2_190-195	1	0.476538	0.581424	3.5608	1.00044	11.1958	5.10227	0.376703
Scouriemore	T2_225-230	1	0.633811	0.644998	2.72158	1.30924	5.13751	3.32547	2.3441
Scouriemore	T2_145-150	1	0.619902	0.968661	3.66526	2.63032	14.0785	11.6105	0.575104
Scouriemore	T2_220	1	0.411299	0.697571	4.15895	1.232	5.31078	1.67695	0.249956
Scouriemore	T2_110-115	1	0.235866	0.373619	2.96237	1.48309	14.5998	11.9112	0.780623
Scouriemore	LW16-639A	2	0.540275	0.850335	1.70784	1.00958	7.21676	8.10378	1.98188
Scouriemore	LW16-643B	2	0.415443	0.700448	0.961206	0.740164	6.38635	6.66143	0.914103
Scouriemore	LW16-657	2	0.44131	0.770085	1.91701	1.09515	10.6958	9.85189	1.73563
Achmelvich	LW16-619B	2	0.398798	0.510825	1.94532	0.496976	3.97102	3.84704	0.573053
Achmelvich	LW16-620A	2	0.218469	0.323683	1.38484	0.182066	2.23602	4.27677	1.24618
Drumbeg	LW16-44	2	0.383337	0.618049	2.13107	0.55374	4.6916	5.9929	0.512387
Drumbeg	LW16--45A	2	0.444894	0.610889	1.5921	1.06896	5.37914	6.47447	4.24487
Drumbeg	LW16-45B	2	0.84834	0.949963	1.38027	1.22263	10.8191	18.5566	4.71308
Drumbeg	LW17-DB3B	3	1.20872	4.02054	10.4823	3.67689	19.8016	36.0027	5.63111
Drumbeg	LW17-DB4	3	0.48425	1.00197	2.79516	1.49253	20.2688	12.1616	4.85775
LEC	LW16-627C	2	0.501113	0.92862	1.16019	0.230943	3.40209	4.95161	0.877972
LEC	LW16-629	2	0.792347	0.830734	2.64332	0.79947	5.67341	5.24623	0.155722
LEC	LW17-E1	3	0.26124	0.691269	0.566952	0.619786	37.5618	1.39797	2.25045
LEC	LW17-E2B	3	0.659249	0.737255	2.90947	0.707208	7.8262	2.76868	0.425464
LEC	LW17-E3	3	0.330422	1.06644	6.14418	1.52644	18.4407	17.2424	3.72492
Achiltibuie	LW16-799B	2	0.635485	0.873377	3.73899	0.842932	7.87422	10.2088	1.58002
Achiltibuie	LW16-808A	2	0.819039	1.02788	2.01358	0.745379	4.53208	6.14725	1.86064
Loch an Daimh Mor	LEW014	1	0.353356	0.443709	0.559343	0.187144	0.74092	1.20826	6.26404
Loch an Daimh Mor	UBCr-perid1	1	4.62478	2.33506	2.224	0.519863	5.65078	3.52086	0.315016
Loch an Daimh Mor	UBCr-p2	1	11.1582	7.02691	7.57329	1.24129	2.09413	1.36107	0.378876
Loch an Daimh Mor	UBCr-p3	1	3.16964	1.73747	1.59044	0.318723	1.15034	0.741034	0.186387
Loch an Daimh Mor	X11A	1	0.0507034	0.378942	0.717854	0.218825	3.25703	1.65854	0.757883
Loch an Daimh Mor	X11B	1	0.395355	2.89174	4.39409	1.03922	9.29085	15.1715	3.23062
Gorm Chnoc	LW17-GC3	3	0.0323852	0.0816476	0.480517	0.543096	11.246	11.975	1.04274
Gorm Chnoc	LW17-GC5	3	0.0231078	0.0823942	0.159215	0.256613	4.27954	12.8054	4.13241
Geodh' nan Sgadan	LW17-BCT4	3	0.0218241	0.109986	0.293752	0.75451	8.31763	1.08545	1.76332
Geodh' nan Sgadan	LW17-BCT8	3	0.0327098	0.0648944	1.61623	0.640288	8.02626	1.97258	1.96867
	Duplicates		Os	Ir	Ru	Rh	Pt	Pd	Au
	LW16-Y10C		0.332804	0.608075	1.40431	0.766575	7.18157	8.61276	0.967445
	LW16-44		0.39613	0.580192	2.55895	0.643039	4.88122	5.92786	0.476946
	LW16-799B		0.681242	0.813165	1.46819	0.921873	8.20466	14.0355	5.97128
	UBCr-p2		9.13237	6.15035	8.18491	0.989184	1.33717	0.857316	0.222073
	UBCr-p3		2.94484	1.47413	1.35572	0.338758	1.42049	0.74127	0.379942
	LEW004		0.0315417	0.0286446	0.104649	0.095282	1.67461	0.565881	1.23178
	Standards - analysed
			Os	Ir	Ru	Rh	Pt	Pd	Au
			ppb	ppb	ppb	ppb	ppb	ppb	ppb
	TDB1	1	0.10992	0.0789042	0.202096	0.502436	6.20246	21.4813	6.816
	WPR1	1	13.388	14.646	21.8689	12.4502	272.635	231.904	37.2723
	WMG1	1	23.4042	46.3794	28.3732	23.783	734.922	361.165	113.109
	Wits1c	2	1.09819	1.41339	3.98254	1.09522	6.72305	5.16883	6.08353
	WPR1	2	10.8333	14.0141	19.7398	13.196	282.346	239.691	40.4487
	TDB1	3	0.0964499	0.138593	0.464909	0.419192	6.54813	22.4329	5.52053
	SARM64	3	35.7641	51.8009	220.953	83.9808	479.927	216.141	11.0798
	Standards - expected values
			Os	Ir	Ru	Rh	Pt	Pd	Au
	TDB1		0.1	0.15	0.3	0.7	5.8 +/- 1.1	22.4 +/- 1.4	6.3 +/- 1.0
	WPR1		11.5	13.5	22	13.4	285	235	43
	WMG1		24	46	35	26	731	382	110
	Wits1		1.09819	1.4 ± 0.3	3.9 ± 08	1.1 ± 0.2	5.7 ± 1.6	5.0 ± 1.2	4.9 ± 2.6
	Precision, calculated using the analyses of standard TDB1 from the 2 batches
			Os	Ir	Ru	Rh	Pt	Pd	Au
	TDB1	1	0.10992	0.0789042	0.202096	0.502436	6.20246	21.4813	6.816
	TDB1	3	0.0964499	0.138593	0.464909	0.419192	6.54813	22.4329	5.52053
	certified values		0.1	0.15	0.3	0.7	5.8	22.4	6.3
	Mean		0.103185	0.108749	0.333503	0.460814	6.3753	21.9571	6.16827
	Sd dev		0.00952501	0.0422063	0.185837	0.0588623	0.244426	0.672843	0.916035
	% RSD		9.231	38.8109	55.7229	12.7736	3.83395	3.06435	14.8508
	Blanks		Os	Ir	Ru	Rh	Pt	Pd	Au
	BLANK		0.00379321	0.00280027	0.174072	0.0742377	0.194241	0.158952	0.0838165
	BLANK2		0.00252881	0.00280027	0.23878	0.0742377	0.222189	0.158952	0.0838165
	BLANK3		0.00379321	0.00280027	0.227407	0.0753798	0.194241	0.154378	0.159389
